# Supplementary material for: Differential attraction of drosophilids to banana baits inoculated with Saccharomyces cerevisiae and Hanseniaspora uvarum within a Neotropical forest remnant
Source: PeerJ. 2017 Mar 9;5:e3063. doi: 10.7717/peerj.3063 (PMC5346285; doi:10.7717/peerj.3063)
Supplement: Data S1 — List of drosophilids (females—sheet 1 and males—sheet 2) collected over uninoculated banana baits and banana baits with Hanseniaspora uvarum and Saccharomyces cerevisiae. [file peerj-05-3063-s001.xlsx]

## Sheet: Females
Collection BTB - Oct 22/2014
Itatiba, SP	S 23°00.073'	W 46°52.917'					Species	Group	Bn	Hu	Sc	Total		groups	Bn	Hu	Sc	Total
Alt = 740 m							calloptera	calloptera	0	0	2	2		calloptera	0	0	2	2
List of drosofilids (females) collected over uninoculated banana baits and banana baits with Hanseniaspora uvarum and Saccharomyces cerevisiae.							D. polymorpha	cardini	0	1	1	2		cardini	0	1	1	2
Strain	Species	Treatment	Observation	Responsable for species identification	group	chk	D. griseolineata	guarani	0	5	8	13		guarani	0	10	13	23
BTB-62	Drosophila cuaso	uninnoculated banana	F1 male stored without aedeagus.	Marcos Batista	tripunctata	1	D. maculifrons	guarani	0	1	3	4		immigrans	0	3	0	3
BTB-48	D. mediopunctata	uninnoculated banana	F1 male stored without aedeagus.	Fabiana Uno/ Marcos Batista	tripunctata	2	unindentified	guarani	0	4	2	6		melanogaster	0	5	4	9
alc-ot58	unidentified	uninnoculated banana	Lost isofemale.	Marcos Batista	tripunctata	3	D. immigrans	immigrans	0	3	0	3		tripunctata	3	14	32	49
alc-ot59	unidentified	uninnoculated banana	Lost isofemale.	Marcos Batista	willistoni	4	D. simulans	melanogaster	0	5	3	8		willistoni	2	30	5	37
alc-ot60	unidentified	uninnoculated banana	Lost isofemale.	Marcos Batista	willistoni	5	D. suzukii	melanogaster	0	0	1	1		Zapriounus	0	2	0	2
alc-ot45	D. polymorpha	Hanseniaspora uvarum	Isofemale identified by external morphology.	Marcos Batista	cardini	1	unindentified M1	tripunctata	0	3	11	14		Total	5	65	57	127
alc-ot6	D. griseolineata	Hanseniaspora uvarum	Isofemale identified by external morphology.	Marcos Batista	guarani	2	D. cuaso	tripunctata	1	0	0	1
alc-ot7	D. griseolineata	Hanseniaspora uvarum	Isofemale identified by external morphology.	Marcos Batista	guarani	3	D. mediopunctata	tripunctata	1	2	4	7
alc-ot8	D. griseolineata	Hanseniaspora uvarum	Isofemale identified by external morphology.	Marcos Batista	guarani	4	D. paraguayensis	tripunctata	0	2	2	4		Bn - flies collected over uninoculated banana baits.
BTB-52	D. griseolineata	Hanseniaspora uvarum	Isofemale identified by external morphology.	Marcos Batista	guarani	5	D. paramediostriata	tripunctata	0	1	0	1		Hu - flies collected over banana baits inoculated with Hanseniaspora uvarum.
BTB-55	D. griseolineata	Hanseniaspora uvarum	Isofemale identified by external morphology.	Marcos Batista	guarani	6	unindentified	tripunctata	1	6	15	22		Sc - flies collected over banana baits inoculated with Saccharomyces cerevisiae.
alc-ot39	D. maculifrons	Hanseniaspora uvarum	Isofemale identified by external morphology.	Marcos Batista	guarani	7	D. willistoni	willistoni	2	19	3	24
alc-ot40	unidentified	Hanseniaspora uvarum	Isofemale identified by external morphology.	Marcos Batista	guarani	8	D. nebulosa	willistoni	0	11	2	13
alc-ot41	unidentified	Hanseniaspora uvarum	Isofemale identified by external morphology.	Marcos Batista	guarani	9	Z. indianus	Zaprionus	0	2	0	2
alc-ot42	unidentified	Hanseniaspora uvarum	Isofemale identified by external morphology.	Marcos Batista	guarani	10	Total	Total	5	65	57	127
alc-ot43	unidentified	Hanseniaspora uvarum	Isofemale identified by external morphology.	Marcos Batista	guarani	11			0	0	0
BTB-1	D. immigrans	Hanseniaspora uvarum	Isofemale identified by external morphology.	Fabiana Uno/ Marcos Batista	immigrans	12
BTB-66	D. immigrans	Hanseniaspora uvarum	Isofemale identified by external morphology.	Marcos Batista	immigrans	13
alc-ot44	unidentified	Hanseniaspora uvarum	Isofemale identified by external morphology.	Marcos Batista	immigrans	14
alc-ot1	D. melanogaster	Hanseniaspora uvarum	Isofemale identified by external morphology.	Marcos Batista	melanogaster	15
alc-ot2	D. melanogaster	Hanseniaspora uvarum	Isofemale identified by external morphology.	Marcos Batista	melanogaster	16
alc-ot3	D. melanogaster	Hanseniaspora uvarum	Isofemale identified by external morphology.	Marcos Batista	melanogaster	17
alc-ot4	D. melanogaster	Hanseniaspora uvarum	Isofemale identified by external morphology.	Marcos Batista	melanogaster	18
alc-ot46	unidentified	Hanseniaspora uvarum	F1 male stored without aedeagus.	Marcos Batista	melanogaster	19
BTB-32	m1	Hanseniaspora uvarum	Isofemale identified by external morphology.	Fabiana Uno/ Marcos Batista	tripunctata	20
BTB-39	m1	Hanseniaspora uvarum	F1 male stored without aedeagus.	Fabiana Uno/ Marcos Batista	tripunctata	21
BTB-4	m1	Hanseniaspora uvarum	Isofemale identified by external morphology.	Fabiana Uno/ Marcos Batista	tripunctata	22
BTB-24	D. mediopunctata	Hanseniaspora uvarum		Fabiana Uno/ Marcos Batista	tripunctata	23
BTB-50	D. mediopunctata	Hanseniaspora uvarum	F1 male stored without aedeagus.	Marcos Batista	tripunctata	24
BTB-68	D. paramediostriata	Hanseniaspora uvarum	F1 male stored without aedeagus.	Marcos Batista	tripunctata	25
BTB-53	D. paraguayensis	Hanseniaspora uvarum	F1 male stored without aedeagus.	Marcos Batista	tripunctata	26
BTB-56	D. paraguayensis	Hanseniaspora uvarum	F1 male stored without aedeagus.	Marcos Batista	tripunctata	27
BTB-34	unidentified	Hanseniaspora uvarum	F1 male stored without aedeagus.	Fabiana Uno/ Marcos Batista	tripunctata	28
BTB-54	unidentified	Hanseniaspora uvarum	F1 male stored without aedeagus.	Marcos Batista	tripunctata	29
BTB-57	unidentified	Hanseniaspora uvarum	F1 male stored without aedeagus.	Marcos Batista	tripunctata	30
BTB-59	unidentified	Hanseniaspora uvarum	F1 male stored without aedeagus.	Marcos Batista	tripunctata	31
BTB-60	unidentified	Hanseniaspora uvarum	F1 male stored without aedeagus.	Marcos Batista	tripunctata	32
BTB-61	unidentified	Hanseniaspora uvarum	F1 male stored without aedeagus.	Marcos Batista	tripunctata	33
alc-ot10	D. nebulosa	Hanseniaspora uvarum	Female identified by external morphology.	Marcos Batista	willistoni	34
alc-ot11	D. nebulosa	Hanseniaspora uvarum	Female identified by external morphology.	Marcos Batista	willistoni	35
alc-ot12	D. nebulosa	Hanseniaspora uvarum	Female identified by external morphology.	Marcos Batista	willistoni	36
alc-ot13	D. nebulosa	Hanseniaspora uvarum	Female identified by external morphology.	Marcos Batista	willistoni	37
alc-ot14	D. nebulosa	Hanseniaspora uvarum	Female identified by external morphology.	Marcos Batista	willistoni	38
alc-ot15	D. nebulosa	Hanseniaspora uvarum	Female identified by external morphology.	Marcos Batista	willistoni	39
alc-ot16	D. nebulosa	Hanseniaspora uvarum	Female identified by external morphology.	Marcos Batista	willistoni	40
alc-ot17	D. nebulosa	Hanseniaspora uvarum	Female identified by external morphology.	Marcos Batista	willistoni	41
alc-ot18	D. nebulosa	Hanseniaspora uvarum	Female identified by external morphology.	Marcos Batista	willistoni	42
alc-ot19	D. nebulosa	Hanseniaspora uvarum	Female identified by external morphology.	Marcos Batista	willistoni	43
alc-ot9	D. nebulosa	Hanseniaspora uvarum	Female identified by external morphology.	Marcos Batista	willistoni	44
alc-ot20	D. willistoni	Hanseniaspora uvarum	Female identified by external morphology.	Marcos Batista	willistoni	45
alc-ot21	D. willistoni	Hanseniaspora uvarum	Female identified by external morphology.	Marcos Batista	willistoni	46
alc-ot22	D. willistoni	Hanseniaspora uvarum	Female identified by external morphology.	Marcos Batista	willistoni	47
alc-ot23	D. willistoni	Hanseniaspora uvarum	Female identified by external morphology.	Marcos Batista	willistoni	48
alc-ot24	D. willistoni	Hanseniaspora uvarum	Female identified by external morphology.	Marcos Batista	willistoni	49
alc-ot25	D. willistoni	Hanseniaspora uvarum	Female identified by external morphology.	Marcos Batista	willistoni	50
alc-ot26	D. willistoni	Hanseniaspora uvarum	Female identified by external morphology.	Marcos Batista	willistoni	51
alc-ot27	D. willistoni	Hanseniaspora uvarum	Female identified by external morphology.	Marcos Batista	willistoni	52
alc-ot28	D. willistoni	Hanseniaspora uvarum	Female identified by external morphology.	Marcos Batista	willistoni	53
alc-ot29	D. willistoni	Hanseniaspora uvarum	Female identified by external morphology.	Marcos Batista	willistoni	54
alc-ot30	D. willistoni	Hanseniaspora uvarum	Female identified by external morphology.	Marcos Batista	willistoni	55
alc-ot31	D. willistoni	Hanseniaspora uvarum	Female identified by external morphology.	Marcos Batista	willistoni	56
alc-ot32	D. willistoni	Hanseniaspora uvarum	Female identified by external morphology.	Marcos Batista	willistoni	57
alc-ot33	D. willistoni	Hanseniaspora uvarum	Female identified by external morphology.	Marcos Batista	willistoni	58
alc-ot34	D. willistoni	Hanseniaspora uvarum	Female identified by external morphology.	Marcos Batista	willistoni	59
alc-ot35	D. willistoni	Hanseniaspora uvarum	Female identified by external morphology.	Marcos Batista	willistoni	60
alc-ot36	D. willistoni	Hanseniaspora uvarum	Female identified by external morphology.	Marcos Batista	willistoni	61
alc-ot37	D. willistoni	Hanseniaspora uvarum	Female identified by external morphology.	Marcos Batista	willistoni	62
alc-ot38	D. willistoni	Hanseniaspora uvarum	Female identified by external morphology.	Marcos Batista	willistoni	63
alc-ot5	Zaprionus indianus	Hanseniaspora uvarum	Female identified by external morphology.	Marcos Batista	Zapriounus (genus)	64
BTB-65	Zaprionus indianus	Hanseniaspora uvarum	F1 male stored without aedeagus.	Marcos Batista	Zapriounus (genus)	65
BTB-36	D. calloptera	Saccharomyces cerevisiae	Lost isofemale.	Fabiana Uno/ Marcos Batista	calloptera	1
BTB-6	D. calloptera	Saccharomyces cerevisiae	Lost isofemale.	Fabiana Uno/ Marcos Batista	calloptera	2
alc-ot54	D. polymorpha	Saccharomyces cerevisiae	Lost isofemale.	Marcos Batista	cardini	3
BTB-18	D. griseolineata	Saccharomyces cerevisiae		Fabiana Uno/ Marcos Batista	guarani	4
BTB-23	D. griseolineata	Saccharomyces cerevisiae	F1 male stored without aedeagus.	Fabiana Uno/ Marcos Batista	guarani	5
BTB-33	D. griseolineata	Saccharomyces cerevisiae		Fabiana Uno/ Marcos Batista	guarani	6
BTB-45	D. griseolineata	Saccharomyces cerevisiae	F1 male stored without aedeagus.	Fabiana Uno/ Marcos Batista	guarani	7
BTB-46	D. griseolineata	Saccharomyces cerevisiae	F1 male stored without aedeagus.	Fabiana Uno/ Marcos Batista	guarani	8
BTB-63	D. griseolineata	Saccharomyces cerevisiae	F1 male stored without aedeagus.	Marcos Batista	guarani	9
BTB-64	D. griseolineata	Saccharomyces cerevisiae	F1 male stored without aedeagus.	Marcos Batista	guarani	10
BTB-67	D. griseolineata	Saccharomyces cerevisiae	F1 male stored without aedeagus.	Marcos Batista	guarani	11
BTB-9	unidentified	Saccharomyces cerevisiae	Female identified by external morphology.	Fabiana Uno/ Marcos Batista	guarani	12
BTB-20	D. maculifrons	Saccharomyces cerevisiae	F1 male stored without aedeagus.	Fabiana Uno/ Marcos Batista	guarani	13
BTB-27	D. maculifrons	Saccharomyces cerevisiae	F1 male stored without aedeagus.	Fabiana Uno/ Marcos Batista	guarani	14
BTB-37	D. maculifrons	Saccharomyces cerevisiae	F1 male stored without aedeagus.	Fabiana Uno/ Marcos Batista	guarani	15
BTB-38	unidentified	Saccharomyces cerevisiae	F1 male stored without aedeagus.	Fabiana Uno/ Marcos Batista	guarani	16
alc-ot56	D. melanogaster	Saccharomyces cerevisiae	Lost isofemale.	Marcos Batista	melanogaster	17
alc-ot48	D. simulans	Saccharomyces cerevisiae	Female identified by F1 male external morphology.	Marcos Batista	melanogaster	18
alc-ot49	D. simulans	Saccharomyces cerevisiae	Female identified by F1 male external morphology.	Marcos Batista	melanogaster	19
alc-ot47	D. suzukii	Saccharomyces cerevisiae	Female identified by external morphology.	Marcos Batista	melanogaster	20
alc-ot50	D. nebulosa	Saccharomyces cerevisiae	Female identified by external morphology.	Marcos Batista	willistoni	21
alc-ot51	D. nebulosa	Saccharomyces cerevisiae	Female identified by external morphology.	Marcos Batista	willistoni	22
alc-ot52	D. willistoni	Saccharomyces cerevisiae	Female identified by external morphology.	Marcos Batista	willistoni	23
alc-ot53	D. willistoni	Saccharomyces cerevisiae	Female identified by external morphology.	Marcos Batista	willistoni	24
alc-ot55	D. willistoni	Saccharomyces cerevisiae	Lost isofemale.	Marcos Batista	willistoni	25
BTB-16	m1	Saccharomyces cerevisiae	F1 male stored without aedeagus.	Fabiana Uno/ Marcos Batista	tripunctata	26
BTB-17	m1	Saccharomyces cerevisiae	F1 male stored without aedeagus.	Fabiana Uno/ Marcos Batista	tripunctata	27
BTB-2	m1	Saccharomyces cerevisiae	F1 male stored without aedeagus.	Fabiana Uno/ Marcos Batista	tripunctata	28
BTB-21	m1	Saccharomyces cerevisiae	F1 male stored without aedeagus.	Fabiana Uno/ Marcos Batista	tripunctata	29
BTB-28	m1	Saccharomyces cerevisiae	F1 male stored without aedeagus.	Fabiana Uno/ Marcos Batista	tripunctata	30
BTB-29	m1	Saccharomyces cerevisiae	F1 male stored without aedeagus.	Fabiana Uno/ Marcos Batista	tripunctata	31
BTB-42	m1	Saccharomyces cerevisiae	Female identified by external morphology.	Fabiana Uno/ Marcos Batista	tripunctata	32
BTB-44	m1	Saccharomyces cerevisiae	Female identified by external morphology.	Fabiana Uno/ Marcos Batista	tripunctata	33
BTB-51	m1	Saccharomyces cerevisiae	F1 male stored without aedeagus.	Marcos Batista	tripunctata	34
BTB-58	m1	Saccharomyces cerevisiae	F1 male stored without aedeagus.	Marcos Batista	tripunctata	35
BTB-7	m1	Saccharomyces cerevisiae	F1 male stored without aedeagus.	Fabiana Uno/ Marcos Batista	tripunctata	36
BTB-12	D. mediopunctata	Saccharomyces cerevisiae	F1 male stored without aedeagus.	Fabiana Uno/ Marcos Batista	tripunctata	37
BTB-26	D. mediopunctata	Saccharomyces cerevisiae		Fabiana Uno/ Marcos Batista	tripunctata	38
BTB-3	D. mediopunctata	Saccharomyces cerevisiae		Fabiana Uno/ Marcos Batista	tripunctata	39
BTB-8	D. mediopunctata	Saccharomyces cerevisiae		Fabiana Uno/ Marcos Batista	tripunctata	40
BTB-22	D. paraguayensis	Saccharomyces cerevisiae		Fabiana Uno/ Marcos Batista	tripunctata	41
BTB-31	D. paraguayensis	Saccharomyces cerevisiae		Fabiana Uno/ Marcos Batista	tripunctata	42
BTB-10	unidentified	Saccharomyces cerevisiae	F1 male stored without aedeagus.	Fabiana Uno/ Marcos Batista	tripunctata	43
BTB-11	unidentified	Saccharomyces cerevisiae	Lost isofemale.	Fabiana Uno/ Marcos Batista	tripunctata	44
BTB-13	unidentified	Saccharomyces cerevisiae	Lost isofemale.	Fabiana Uno/ Marcos Batista	tripunctata	45
BTB-14	unidentified	Saccharomyces cerevisiae	Lost isofemale.	Fabiana Uno/ Marcos Batista	tripunctata	46
BTB-15	unidentified	Saccharomyces cerevisiae	Isofemale identified by external morphology.	Fabiana Uno/ Marcos Batista	tripunctata	47
BTB-19	unidentified	Saccharomyces cerevisiae	Lost isofemale.	Fabiana Uno/ Marcos Batista	tripunctata	48
BTB-25	unidentified	Saccharomyces cerevisiae	Lost isofemale.	Fabiana Uno/ Marcos Batista	tripunctata	49
BTB-30	unidentified	Saccharomyces cerevisiae	Lost isofemale.	Fabiana Uno/ Marcos Batista	tripunctata	50
BTB-40	unidentified	Saccharomyces cerevisiae	Lost isofemale.	Fabiana Uno/ Marcos Batista	tripunctata	51
BTB-41	unidentified	Saccharomyces cerevisiae	Lost isofemale.	Fabiana Uno/ Marcos Batista	tripunctata	52
BTB-43	unidentified	Saccharomyces cerevisiae	Lost isofemale.	Fabiana Uno/ Marcos Batista	tripunctata	53
BTB-47	unidentified	Saccharomyces cerevisiae	Lost isofemale.	Fabiana Uno/ Marcos Batista	tripunctata	54
BTB-49	unidentified	Saccharomyces cerevisiae	Lost isofemale.	Fabiana Uno/ Marcos Batista	tripunctata	55
BTB-5	unidentified	Saccharomyces cerevisiae	Lost isofemale.	Fabiana Uno/ Marcos Batista	tripunctata	56
BTB-5	unidentified	Saccharomyces cerevisiae	Lost isofemale.	Fabiana Uno/ Marcos Batista	tripunctata	57
	m1 - Drosophila tripunctata specimen with one proeminent oral bristle.

## Sheet: Males
List of drosofilids (males) collected over uninoculated banana baits and banana baits with Hanseniaspora uvarum and Saccharomyces cerevisiae.
Species	Group	Bn	Hu	Sc	Total		Group	Bn	Hu	Sc	Total
Drosophila polymorpha	cardini	0	2	0	2		cardini	0	2	0	2
D. griseolineata	guarani	2	19	32	53		guarani	2	19	39	60
D. maculifrons	guarani	0	0	7	7		immigrans	0	1	0	1
D. immigrans	immigrans	0	1	0	1		melanogaster	1	15	2	18
D. melanogaster	melanogaster	0	1	0	1		tripunctata	3	14	61	78
D. simulans	melanogaster	1	8	1	10		ungrouped	0	4	0	4
D. suzukii	melanogaster	0	6	1	7		willistoni	0	18	2	20
D. bandeirantorum	tripunctata	0	3	1	4		Zapriounus	0	3	0	3
D. cuaso	tripunctata	1	0	1	2		Total	6	76	104	186
D. fragilis	tripunctata	0	1	2	3
D. johnstonae	tripunctata	0	0	1	1		Bn - flies collected over uninoculated banana baits.
D. mediopunctata	tripunctata	2	2	13	17		Hu - flies collected over banana baits inoculated with Hanseniaspora uvarum.
D. nappae	tripunctata	0	0	3	3		Sc - flies collected over banana baits inoculated with Saccharomyces cerevisiae.
D. paraguayensis	tripunctata	0	7	38	45
D. trifilum	tripunctata	0	0	2	2
unidentified	tripunctata	0	1	0	1
unidentified	ungrouped	0	4	0	4
D. willistoni	willistoni	0	16	2	18
D. nebulosa	willistoni	0	2	0	2
Z. indianus	Zaprionus (genus)	0	3	0	3
Total		6	76	104	186
Marcos Batista is responsable for species identification.
